# Supplementary material for: Enhanced upconversion luminescence and controllable phase/shape of NaYF4:Yb/Er crystals through Cu2+ ion doping
Source: Royal Society of Chemistry journal article supplement (doi:10.1039/c7ce02227a), 2018-01-01
Supplement: c7ce02227a1.pdf [file c7ce02227a1.pdf]

## Supporting Information

### **Enhanced upconversion luminescence and controllable phase/shape in NaYF<sub>4</sub>:Yb/Er crystals through Cu<sup>2+</sup> ions doping**

*Kaimin Du,<sup>[a,b]</sup> Xia Xu,<sup>[a,c]</sup> Pengpeng Lei,<sup>[a,c]</sup> Lile Dong,<sup>[a,b]</sup> Manli Zhang,<sup>[a,b]</sup> Jing  
Feng\*<sup>[a]</sup>, Hongjie Zhang\*<sup>[a]</sup>*

<sup>a</sup> State Key Laboratory of Rare Earth Resource Utilization, Changchun Institute of Applied Chemistry, Chinese Academy of Science, 5625 Renmin Street, Changchun 130022, China. E-mail: [fengj@ciac.ac.cn](mailto:fengj@ciac.ac.cn); [hongjie@ciac.ac.cn](mailto:hongjie@ciac.ac.cn); Fax: +86-431-85698041; Tel: +86-431-85262127

<sup>b</sup> University of Science and Technology of China, Hefei 230026, China

<sup>c</sup> University of Chinese Academy of Sciences, Beijing 100049, China

**Table S1** Nominal ratio and ICP-OES results of cation mole ratios in the products

| NaYF <sub>4</sub> :X%Cu/18%Yb/2%Er | Na: Y: Yb: Er: Cu                 |                                   |
|------------------------------------|-----------------------------------|-----------------------------------|
|                                    | Nominal ratio                     | ICP-OES result                    |
| X=0                                | 1.000: 0.800: 0.180: 0.020        | 0.876: 0.837: 0.146: 0.017        |
| X=20                               | 1.000: 0.600: 0.180: 0.020: 0.200 | 1.194: 0.766: 0.189: 0.025: 0.020 |
| X=35                               | 1.000: 0.450: 0.180: 0.020: 0.350 | 1.107: 0.638: 0.277: 0.035: 0.049 |
| X=40                               | 1.000: 0.400: 0.180: 0.020: 0.400 | 1.011: 0.711: 0.202: 0.025: 0.062 |
| X=60                               | 1.000: 0.200: 0.180: 0.020: 0.600 | 0.869: 0.671: 0.180: 0.022: 0.127 |

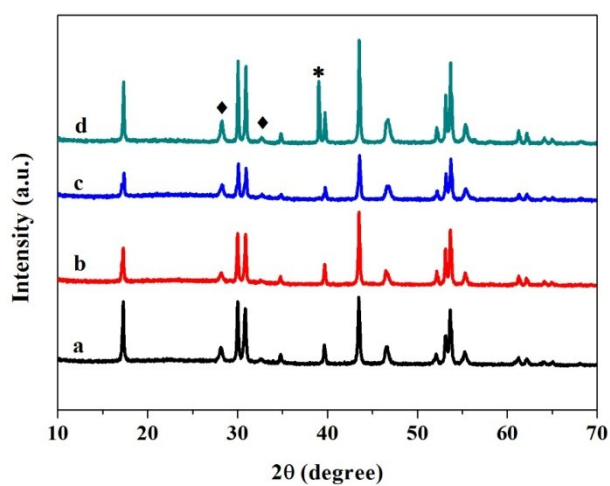

**Fig. S1** XRD patterns of NaYF<sub>4</sub>:Yb/Er crystals with various F<sup>-</sup>/RE<sup>3+</sup> ratio of 4:1, 5:1, 6.67:1, 10:1 (curves a–d), some diffraction peaks of the cubic phase are marked with ◆; The peaks marked by an asterisk (\*) arise from excessive cubic NaF.

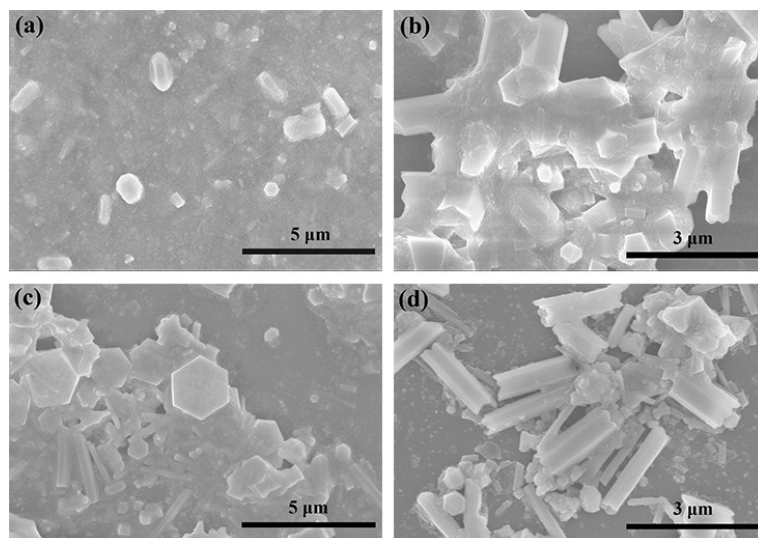

**Fig. S2** The typical SEM images of NaYF<sub>4</sub>:Yb/Er crystals with various F<sup>-</sup>/RE<sup>3+</sup> ratio of (a) 4:1, (b) 5:1, (c) 6.67:1, (d) 10:1.

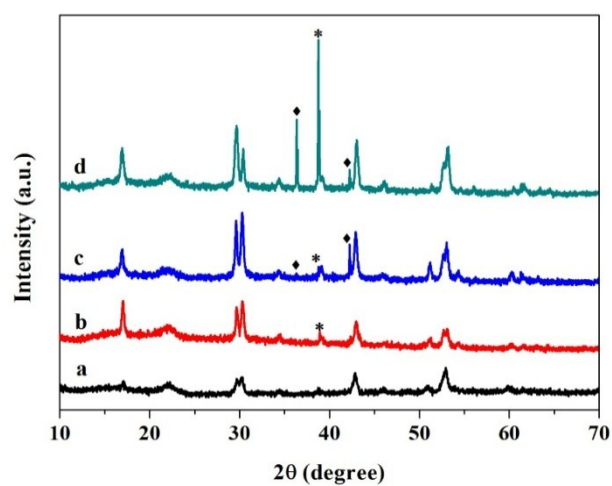

**Fig. S3** XRD patterns of NaGdF<sub>4</sub>:Yb/Er crystals co-doped with Cu<sup>2+</sup> ions at various concentrations of 0, 20, 40 and 60 mol% (curves a–d). The peaks marked by an asterisk (\*) arise from excessive cubic NaF.

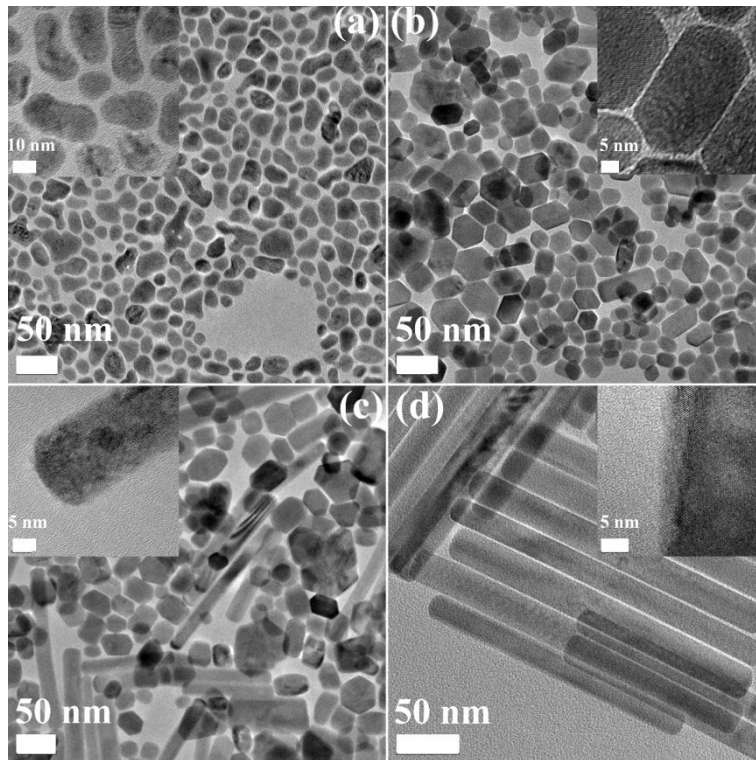

**Fig. S4** Typical TEM images of NaGdF<sub>4</sub>:Yb/Er/Cu crystals. (a) 0 mol% Cu<sup>2+</sup> ion, (b) 20 mol% Cu<sup>2+</sup> ions, (c) 40 mol% Cu<sup>2+</sup> ions, (d) 60 mol% Cu<sup>2+</sup> ions, insets show the corresponding HRTEM images.

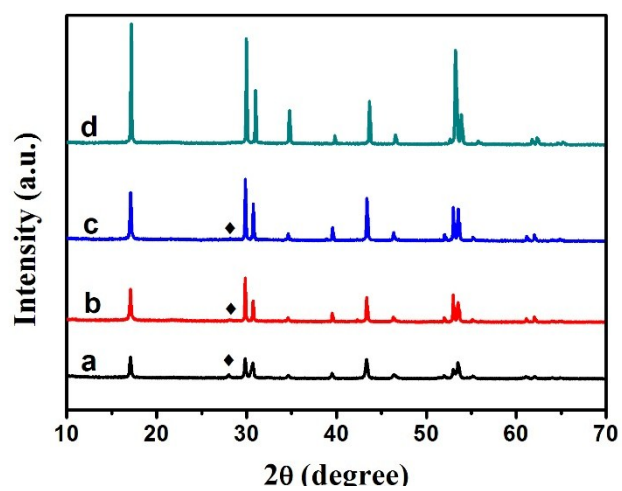

**Fig. S5** XRD patterns of  $\text{NaLuF}_4:\text{Yb/Er}$  crystals co-doped with  $\text{Cu}^{2+}$  ions at various concentrations of 0, 20, 40 and 60 mol% (curves a–d). Some diffraction peaks of the cubic phase are marked with  $\blacklozenge$ .

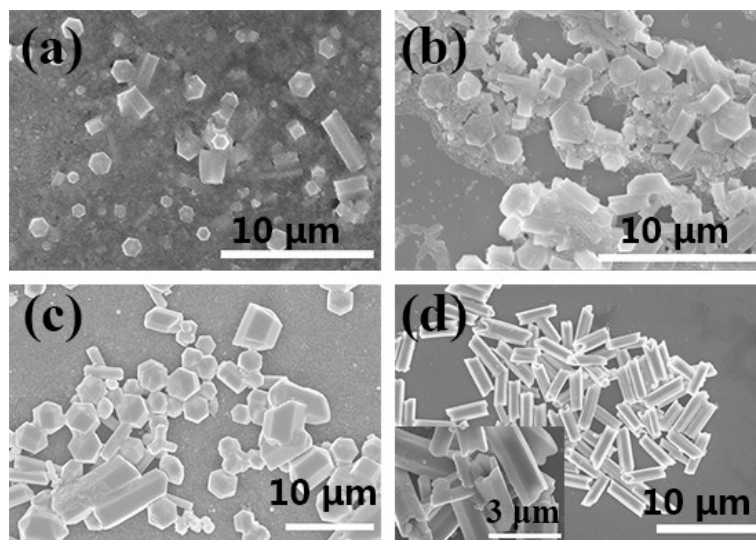

**Fig. S6** Typical SEM images of NaLuF<sub>4</sub>:Yb/Er/Cu crystals. (a) 0 mol% Cu<sup>2+</sup> ion, (b) 20 mol% Cu<sup>2+</sup> ions, (c) 40 mol% Cu<sup>2+</sup> ions, (d) 60 mol% Cu<sup>2+</sup> ions, insets show the corresponding enlarged morphology of the crystal.



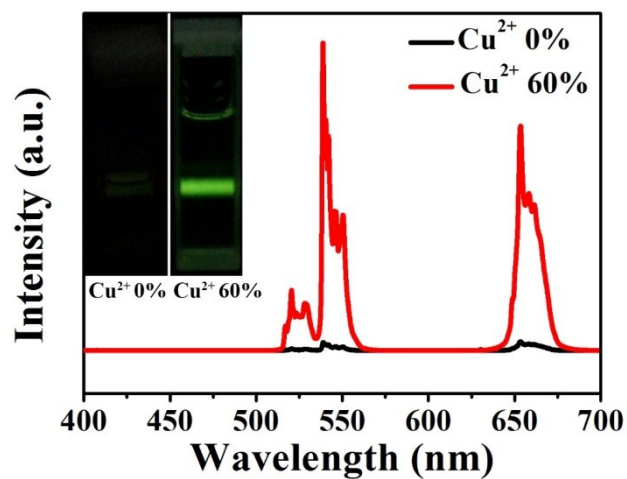

**Fig. S7** Room temperature upconversion emission spectra of NaYF<sub>4</sub>:Yb/Er crystals with 0 and 60 mol% Cu<sup>2+</sup> dopant ions (0.14 W/mm<sup>2</sup>). Inset: luminescence photographs of the corresponding samples dispersed in cyclohexane (1 mg/mL, 0.71 W/mm<sup>2</sup>).

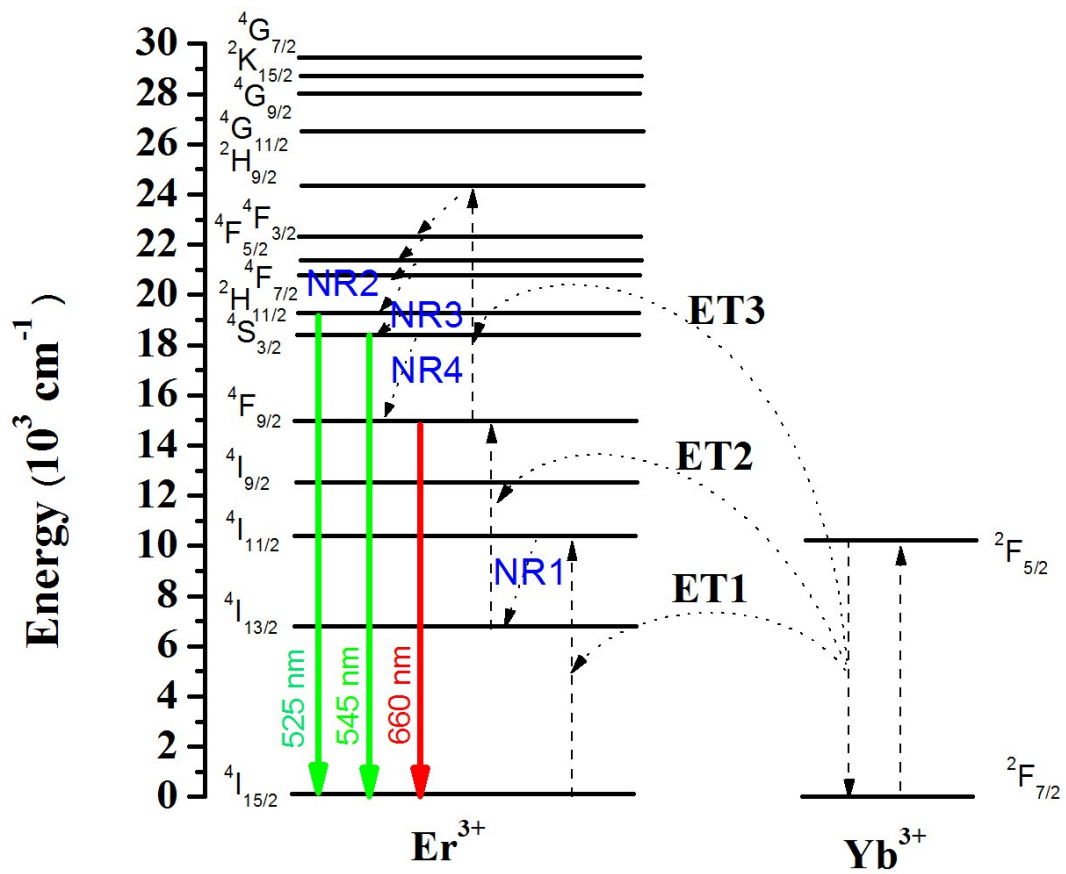

**Fig. S8** Energy level diagrams of  $\text{Er}^{3+}$  and  $\text{Yb}^{3+}$  ions, showing possible energy transfer mechanisms for red and green UC emissions of  $\text{Er}^{3+}$  activators in the host.
